# Supplementary material
Source: publisher figshare collection journal article supplement (https://frontiersin.figshare.com/ndownloader/files/11849042)
Supplement: Supplementary file [file 11849042]

| Team short sprint: KS001                                    |                                                                                                                                 | 9th/10th grade                                                                                                                                                            |                                                                                                                                                           |                                                                                                                                          |                                                                                                                                                                    |
|-------------------------------------------------------------|---------------------------------------------------------------------------------------------------------------------------------|---------------------------------------------------------------------------------------------------------------------------------------------------------------------------|-----------------------------------------------------------------------------------------------------------------------------------------------------------|------------------------------------------------------------------------------------------------------------------------------------------|--------------------------------------------------------------------------------------------------------------------------------------------------------------------|
| 13.CW                                                       | 28.03.-03.04.2016                                                                                                               | aVP II 5/6                                                                                                                                                                | Load 1/3                                                                                                                                                  |                                                                                                                                          |                                                                                                                                                                    |
| Monday                                                      | Tuesday                                                                                                                         | Wednesday                                                                                                                                                                 | Thursday                                                                                                                                                  | Friday                                                                                                                                   | Saturday                                                                                                                                                           |
|                                                             | <b>Coordination/Agility</b><br>Sprint-ABC<br><br><b>Sprint power/Acceleration</b><br>5x<br>30m ZWL/30m Sprint<br>in alternation | <b>AAT</b><br>jump power horizontal 5x20m:<br>Alternating lunge jumps<br>High knee skips<br>Jump run<br>Snatch (5x10m)<br><br><b>Tempo extensive</b><br>10x100m<br>P: 30s | <b>Coordination</b><br><br><b>Speed</b><br>4x 60m increments ZWL; P: 5min<br>4x 30m flying submax.; P: 5-6min<br><br><b>AW Bowl</b><br>Shock fw/bw je 10x | <b>3x increments 50m</b><br><br><b>Speed endurance (curve)</b><br>2x 80/100/120 90%<br>P: 6/8/10min<br><br><b>AAT</b><br>Stability 20min | <b>TEST</b><br>Shock forwards<br>Shock backwards<br>standing long jump<br>Ser SPL with run-up                                                                      |
| Warm up run 10min<br>Gymnastic 10min<br>Cool down run 10min | <b>Power</b>                                                                                                                    | <b>FREE</b>                                                                                                                                                               | <b>Power</b>                                                                                                                                              | <b>FREE</b>                                                                                                                              | <b>AAT</b><br>Minibands<br>Jump power vertical 5x20 rep<br>Ankle jumps<br>Squad jumps<br>Scissor jumps<br>Metcalf<br><br><b>Tempo extensive</b><br>10x100m ; P:30s |
|                                                             |                                                                                                                                 |                                                                                                                                                                           |                                                                                                                                                           |                                                                                                                                          | <b>Sunday</b>                                                                                                                                                      |
|                                                             |                                                                                                                                 |                                                                                                                                                                           |                                                                                                                                                           |                                                                                                                                          | <b>FREE</b>                                                                                                                                                        |

| Team hurdles:                                               |                                                                                                                         | KS005 / KS016                                                                                                                                                             |                                                                                                                                                                                   | 9th/10th grade                                                                                                                           |                                                                                                                                                                    |
|-------------------------------------------------------------|-------------------------------------------------------------------------------------------------------------------------|---------------------------------------------------------------------------------------------------------------------------------------------------------------------------|-----------------------------------------------------------------------------------------------------------------------------------------------------------------------------------|------------------------------------------------------------------------------------------------------------------------------------------|--------------------------------------------------------------------------------------------------------------------------------------------------------------------|
| 13.CW                                                       | 28.03.-03.04.2016                                                                                                       | aVP II 5/6                                                                                                                                                                | Load 1/3                                                                                                                                                                          |                                                                                                                                          |                                                                                                                                                                    |
| Monday                                                      | Tuesday                                                                                                                 | Wednesday                                                                                                                                                                 | Thursday                                                                                                                                                                          | Friday                                                                                                                                   | Saturday                                                                                                                                                           |
|                                                             | <b>Coordination</b><br>Hurdles-ABC<br><br><b>Sprint power/Acceleration</b><br>4x<br>30m ZWL/ 2. Hurdle<br>in alteration | <b>AAT</b><br>jump power horizontal 5x20m:<br>Alternating lunge jumps<br>High knee skips<br>Jump run<br>Snatch (5x10m)<br><br><b>Tempo extensive</b><br>10x100m<br>P: 30s | <b>Coordination</b><br>short 3er, 5 hurdles<br>short 1er, 5 hurdles<br><br><b>Hurdles</b><br>6x 10 hurdles 3er R.<br>Distance 7,50m<br><br><b>AW Bowl</b><br>Shock fw/bw 10x each | <b>3x increments 50m</b><br><br><b>Speed endurance (curve)</b><br>2x 80/100/120 90%<br>P: 6/8/10min<br><br><b>AAT</b><br>Stability 20min | <b>TEST</b><br>Shock forwards<br>Shock backwards<br>Standing long jump<br>5er SPL with run-up                                                                      |
| Warm up run 10min<br>Gymnastic 10min<br>Cool down run 10min | <b>Power</b>                                                                                                            | <b>Free</b>                                                                                                                                                               | <b>Power</b>                                                                                                                                                                      | <b>FREE</b>                                                                                                                              | <b>AAT</b><br>Minibands<br>Jump power vertical 5x20 rep<br>Ankle jumps<br>Squad jumps<br>Scissor jumps<br>Metcalf<br><br><b>Tempo extensive</b><br>10x100m ; P:30s |
|                                                             |                                                                                                                         |                                                                                                                                                                           |                                                                                                                                                                                   |                                                                                                                                          | <b>Sunday</b>                                                                                                                                                      |
|                                                             |                                                                                                                         |                                                                                                                                                                           |                                                                                                                                                                                   |                                                                                                                                          | <b>FREE</b>                                                                                                                                                        |

| Team hurdles:                                               |                                                                                                                         | KS007 / KS008 / KS012 / KS014                                                                                                                                             |                                                                                                                                                                                 | 11th/12th grade                                                                                                                          |                                                                                                                   |
|-------------------------------------------------------------|-------------------------------------------------------------------------------------------------------------------------|---------------------------------------------------------------------------------------------------------------------------------------------------------------------------|---------------------------------------------------------------------------------------------------------------------------------------------------------------------------------|------------------------------------------------------------------------------------------------------------------------------------------|-------------------------------------------------------------------------------------------------------------------|
| 13.CW                                                       | 28.03.-03.04.2016                                                                                                       | aVP II 5/6                                                                                                                                                                | Load 1/3                                                                                                                                                                        |                                                                                                                                          |                                                                                                                   |
| Monday                                                      | Tuesday                                                                                                                 | Wednesday                                                                                                                                                                 | Thursday                                                                                                                                                                        | Friday                                                                                                                                   | Saturday                                                                                                          |
|                                                             | <b>Coordination</b><br>Hurdles-ABC<br><br><b>Sprint power/Acceleration</b><br>5x<br>30m ZWL/ 2. Hurdle<br>in alteration | <b>AAT</b><br>Jump power horizontal 5x20m:<br>Alternating lunge jumps<br>High knee skips<br>Jump run<br>Snatch (5x10m)<br><br><b>Tempo extensive</b><br>10x100m<br>P: 30s | <b>Coordination</b><br>short 3er, 5 hurdles<br>short 1er, 5 hurdles<br><br><b>Hurdles</b><br>8x 10 hurdles 3er R.<br>Distance 7,50m<br><br><b>AW Bowl</b><br>Shock fw/bw je 10x | <b>3x increments 50m</b><br><br><b>Speed endurance (curve)</b><br>2x 80/100/120 90%<br>P: 6/8/10min<br><br><b>AAT</b><br>Stability 20min | <b>TEST</b><br>Shock forwards<br>Shock backwards<br>Standing long jump<br>5er SPL with run-up                     |
| Warm up run 10min<br>Gymnastic 10min<br>Cool down run 10min | <b>Power</b>                                                                                                            | <b>FREE</b>                                                                                                                                                               | <b>Power</b>                                                                                                                                                                    | <b>FREE</b>                                                                                                                              | <b>AAT</b><br>Minibands<br>Jump power vertical 5x20 rep<br>Ankle jumps<br>Squad jumps<br>Scissor jumps<br>Metcalf |
|                                                             |                                                                                                                         |                                                                                                                                                                           |                                                                                                                                                                                 |                                                                                                                                          | <b>Tempo extensive</b><br>10x100m ; P:30s                                                                         |
|                                                             |                                                                                                                         |                                                                                                                                                                           |                                                                                                                                                                                 |                                                                                                                                          | <b>Sunday</b>                                                                                                     |
|                                                             |                                                                                                                         |                                                                                                                                                                           |                                                                                                                                                                                 |                                                                                                                                          | <b>FREE</b>                                                                                                       |

| Team long sprint:                                           |                                                                                                                       | KS003 / KS018                                                                                                                                                              |                                                                                                                                                             | 9th/10th grade                                                                                                                                       |                                                                                                                                                                   |
|-------------------------------------------------------------|-----------------------------------------------------------------------------------------------------------------------|----------------------------------------------------------------------------------------------------------------------------------------------------------------------------|-------------------------------------------------------------------------------------------------------------------------------------------------------------|------------------------------------------------------------------------------------------------------------------------------------------------------|-------------------------------------------------------------------------------------------------------------------------------------------------------------------|
| 13.CW                                                       | 28.03.-03.04.2016                                                                                                     | aVP II 5/6                                                                                                                                                                 | Load 1/3                                                                                                                                                    |                                                                                                                                                      |                                                                                                                                                                   |
| Monday                                                      | Tuesday                                                                                                               | Wednesday                                                                                                                                                                  | Thursday                                                                                                                                                    | Friday                                                                                                                                               | Saturday                                                                                                                                                          |
|                                                             | <b>Coordination</b><br>Sprint-ABC<br><br><b>Jump power/Acceleration</b><br>4x<br>30m ZWL/30m Sprint<br>in alternation | <b>AAT</b><br>Jump power horizontal 5x20m:<br>Alternating lunge jumps<br>High knee skips<br>Jump run<br>Snatch (5x10m)<br><br><b>Tempo extensive</b><br>10x200m<br>P: 1min | <b>Coordination</b><br><br><b>Speed</b><br>4x 60m increments ZWL; P: 5min<br>4x 30m flying submax.; P: 5-6min<br><br><b>AW Bowl</b><br>Shock fw/bw 10x each | <b>Hurdles</b><br>5x 5 hurdles 5er R. curve<br><br><b>Speed endurance</b><br>2x 100/200/300m 85%<br>P: 4/6/8min<br><br><b>AAT</b><br>Stability 20min | <b>TEST</b><br>Shock forwards<br>Shock backwards<br>Standing long jump<br>5er SPL with run-up                                                                     |
| Warm up run 10min<br>Gymnastic 10min<br>Cool down run 10min | <b>Power</b>                                                                                                          |                                                                                                                                                                            | <b>Power</b>                                                                                                                                                |                                                                                                                                                      | <b>AAT</b><br>Minibands<br>Jump power vertical 5x20 rep<br>Ankle jumps<br>Squad jumps<br>Scissor jumps<br>Metcalf<br><br><b>Tempo extensiv</b><br>10x100m ; P:30s |
|                                                             |                                                                                                                       |                                                                                                                                                                            |                                                                                                                                                             |                                                                                                                                                      | <b>Sunday</b>                                                                                                                                                     |
|                                                             |                                                                                                                       |                                                                                                                                                                            |                                                                                                                                                             |                                                                                                                                                      | <b>FREE</b>                                                                                                                                                       |

|                                                                          |  |                                                                                                                            |                       |                                                                                                                                                                                    |                 |                                                                                                                                                              |  |                                                                                                                                                        |  |                                                                                                                                                                                                              |  |
|--------------------------------------------------------------------------|--|----------------------------------------------------------------------------------------------------------------------------|-----------------------|------------------------------------------------------------------------------------------------------------------------------------------------------------------------------------|-----------------|--------------------------------------------------------------------------------------------------------------------------------------------------------------|--|--------------------------------------------------------------------------------------------------------------------------------------------------------|--|--------------------------------------------------------------------------------------------------------------------------------------------------------------------------------------------------------------|--|
| Team long sprint:                                                        |  |                                                                                                                            | KS002 / KS004 / KS020 |                                                                                                                                                                                    | 11th/12th grade |                                                                                                                                                              |  |                                                                                                                                                        |  |                                                                                                                                                                                                              |  |
| 13.CW                                                                    |  | 28.03.-03.04.2016                                                                                                          |                       | aVP II 5/6                                                                                                                                                                         |                 | Load 1/3                                                                                                                                                     |  |                                                                                                                                                        |  |                                                                                                                                                                                                              |  |
| Monday                                                                   |  | Tuesday                                                                                                                    |                       | Wednesday                                                                                                                                                                          |                 | Thursday                                                                                                                                                     |  | Friday                                                                                                                                                 |  | Saturday                                                                                                                                                                                                     |  |
|                                                                          |  | <div>Coordination<br/>Sprint-ABC</div> <div>jump power/Acceleration<br/>5x<br/>30m ZWL/30m Sprint<br/>in alternation</div> |                       | <div>AAT<br/>Jump power horizontal 5x20m:<br/>Alternating lunge jumps<br/>High knee skips<br/>Jump run<br/>Snatch (5x10m)</div> <div>Tempo extensive<br/>10x200m<br/>P: 1min</div> |                 | <div>Coordination</div> <div>Speed<br/>4x 60m increments ZWL; P: 5min<br/>4x 30m flying submax.; P: 5-6min</div> <div>AW Bowl<br/>Shock fw/bw 10x each</div> |  | <div>Hurdles<br/>5x 5 hurdles Ser R. curve</div> <div>Speed endurance<br/>2x 100/200/300m 85%<br/>P: 4/6/8min</div> <div>AAT<br/>Stability 20min</div> |  | <div>TEST<br/>Shock forwards<br/>Shock backwards<br/>Standing long jump<br/>5er SPL with run-up</div>                                                                                                        |  |
| <div>Warm up run 10min<br/>Gymnastic 10min<br/>Cool down run 10min</div> |  | Power                                                                                                                      |                       |                                                                                                                                                                                    |                 | Power                                                                                                                                                        |  |                                                                                                                                                        |  | <div>AAT<br/>Minibands<br/>Jump power vertical 5x20 rep<br/>Ankle jumps<br/>Squad jumps<br/>Scissor jumps<br/>Metcalf</div> <div>Tempo extensive<br/>10x100m ; P:30s</div> <div>Sunday</div> <div>FREE</div> |  |

|                                                             |         |                   |          |            |          |
|-------------------------------------------------------------|---------|-------------------|----------|------------|----------|
| Team long jump:                                             |         | KS016             |          | 10th grade |          |
| 13.CW                                                       |         | 28.03.-03.04.2016 |          | aVP II 5/6 |          |
| Load 1/3                                                    |         |                   |          |            |          |
| Monday                                                      | Tuesday | Wednesday         | Thursday | Friday     | Saturday |
|                                                             |         |                   |          |            |          |
| Warm up run 10min<br>Gymnastic 10min<br>Cool down run 10min |         |                   |          |            | Sunday   |
|                                                             |         |                   |          |            |          |

|                                                             |         |                   |          |                 |          |
|-------------------------------------------------------------|---------|-------------------|----------|-----------------|----------|
| Team long jump:                                             |         | KS014             |          | 11th/12th grade |          |
| 13.CW                                                       |         | 28.03.-03.04.2016 |          | aVP II 5/6      |          |
| Load 1/3                                                    |         |                   |          |                 |          |
| Monday                                                      | Tuesday | Wednesday         | Thursday | Friday          | Saturday |
|                                                             |         |                   |          |                 |          |
| Warm up run 10min<br>Gymnastic 10min<br>Cool down run 10min |         |                   |          |                 | Sunday   |
|                                                             |         |                   |          |                 |          |
